# Supplementary material
Source: HighWire-hosted journal article supplement (http://ajnr-stage2.highwire.org/highwire/filestream/98456/field_highwire_adjunct_files/0/0460.pdf)
Supplement: 0460.pdf [file 0460.pdf]

## Supplementary online materials

[Figure S1. Subgroup analysis with a modified primary outcome definition](#)

[Table S1. Patient and aneurysm characteristics for all groups](#)

[Table S2. Interventions carried out in the randomized groups](#)

[Table S3. Primary safety outcome and safety of flow diversion](#)

[Table S4. Primary efficacy outcome in the per protocol analyses](#)

[Table S5. Secondary outcomes](#)

[Table S6. Occlusion state of the aneurysm](#)

[Table S7. Adverse Events](#)

[Table S8. Details of poor clinical outcome at any time point, for all patients](#)

[Table S9. mRS scores for all RCT patients](#)

**Figure S1.** Subgroup analysis with a modified primary outcome definition.

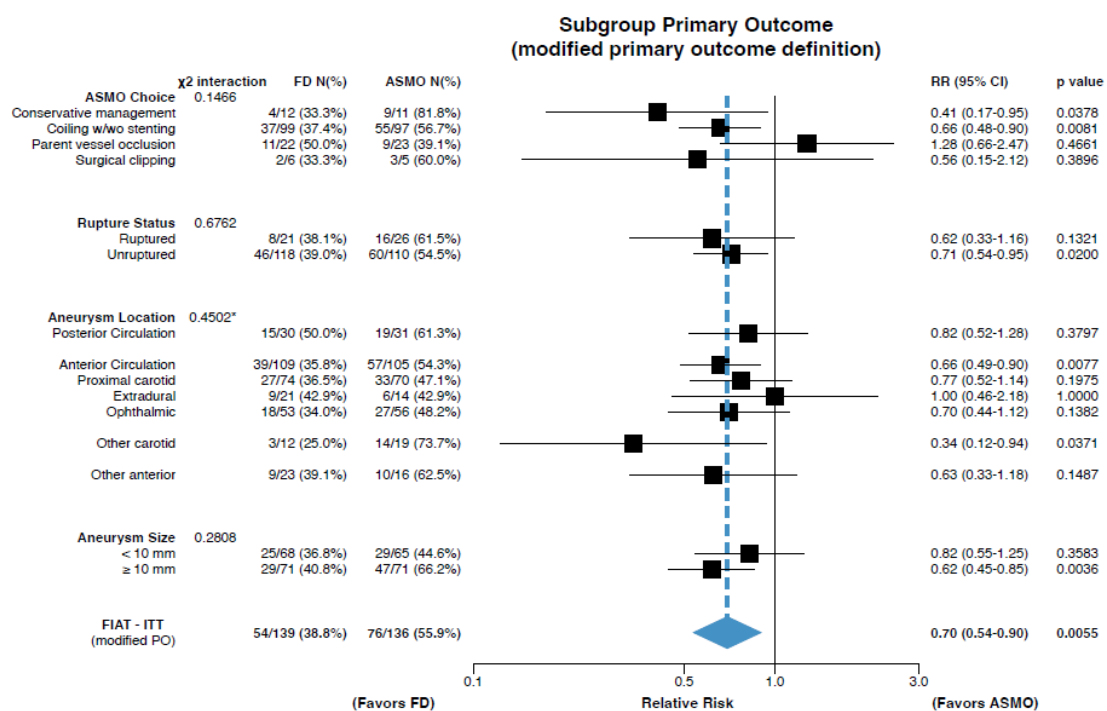

\*The interaction term for Aneurysm Location was calculated for the main division into Anterior/Posterior

The angiographic component of the Primary Outcome was modified to comprise only complete occlusions, instead of complete and near-complete occlusions.

**Table S1.** Patient and aneurysm characteristics for all groups.

| Characteristics            | Randomization   |                             | Registry<br>N = 45 | Any Flow Diverter*<br>N = 209 |
|----------------------------|-----------------|-----------------------------|--------------------|-------------------------------|
|                            | ASMO<br>N = 139 | Flow<br>Diverion<br>N = 139 |                    |                               |
| <b>Age, Mean (SD)</b>      | 57 (12)         | 58 (12)                     | 58 (12)            | 58 (12)                       |
| <b>Female, N (%)</b>       | 108 (77.7%)     | 110 (79.1%)                 | 33 (73.3%)         | 162 (77.5%)                   |
| <b>Presentation, N (%)</b> |                 |                             |                    |                               |
| Asymptomatic               | 72 (51.8%)      | 78 (56.1%)                  | 24 (53.3%)         | 115 (55.0%)                   |
| Mass effect                | 41 (29.5%)      | 40 (28.8%)                  | 14 (31.1%)         | 60 (28.7%)                    |
| SAH                        | 26 (18.7%)      | 21 (15.1%)                  | 7 (15.6%)          | 34 (16.3%)                    |
| <b>Aneurysm size (mm)</b>  |                 |                             |                    |                               |
| Mean (SD)                  | 13 (9)          | 13 (10)                     | 16 (12)            | 14 (11)                       |
| Median (range)             | 10 (2 – 51)     | 10 (1 – 56)                 | 14 (2–60)          | 11 (1–60)                     |
| 0 – 9, N (%)               | 66 (47.5%)      | 68 (48.9%)                  | 16 (35.6%)         | 94 (45.0%)                    |
| 10 – 25, N (%)             | 59 (42.4%)      | 54 (38.8%)                  | 24 (53.3%)         | 89 (42.6%)                    |
| > 25, N (%)                | 14 (10.1%)      | 17 (12.2%)                  | 5 (11.1%)          | 26 (12.4%)                    |
| <b>Aneurysm neck (mm)</b>  |                 |                             |                    |                               |
| Mean (SD)                  | 5 (3)           | 5 (3)                       | 6 (3)              | 5 (3)                         |
| Median (Min – Max)         | 5 (2 – 15)      | 5 (1 – 16)                  | 5 (2 – 16)         | 5 (1 – 16)                    |
| Undefined, N (%)           | 22 (15.8%)      | 21 (15.1%)                  | 22 (48.9%)         | 49 (23.4%)                    |
| <b>Location, N (%)</b>     |                 |                             |                    |                               |
| Anterior circulation       | 108 (77.7%)     | 109 (78.4%)                 | 36 (80.0%)         | 165 (78.9%)                   |
| Proximal Carotid           | 71 (51.1%)      | 74 (53.2%)                  | 27 (60.0%)         | 114 (54.5%)                   |
| Extradural                 | 14 (10.1%)      | 21 (15.1%)                  | 10 (22.2%)         | 34 (16.3%)                    |
| Ophthalmic                 | 57 (41.0%)      | 53 (38.1%)                  | 17 (37.8%)         | 80 (38.3%)                    |
| Other carotid              | 20 (14.4%)      | 12 (8.6%)                   | 4 (8.9%)           | 20 (9.6%)                     |
| Other anterior             | 17 (12.2%)      | 23 (16.5%)                  | 5 (11.1%)          | 31 (14.8%)                    |
| Posterior circulation      | 31 (22.3%)      | 30 (21.6%)                  | 9 (20.0%)          | 44 (21.1%)                    |

\* Any flow diverter includes: All patients randomly allocated FD (n=139), patients who received FD in the registry (45), and patients of the ASMO group who received FD at any time (14 cross-overs included in primary analyses and 11 retreatments after aneurysm recurrence (once the primary outcome of the RCT was completed).

**Table S2.** Interventions carried out in the randomized groups.

|                       | <b>Randomization</b>    |                                   |
|-----------------------|-------------------------|-----------------------------------|
|                       | <b>ASMO<br/>N = 139</b> | <b>Flow Diversion<br/>N = 139</b> |
| FD only               | 11 (7·9%)               | 106 (76·3%)                       |
| FD with coils         | 2 (1·4%)                | 20 (14·4%)                        |
| FD with stent         | 1 (0·7%)                | 3 (2·2%)                          |
| Simple coiling        | 51 (36·7%)              | 4 (2·9%)                          |
| Coiling with<br>stent | 36 (25·9%)              | 1 (0·7%)                          |
| PVO                   | 21 (15·1%)              | 1 (0·7%)                          |
| Surgical clipping     | 6 (4·3%)                | 1 (0·7%)                          |
| Observation           | 11 (7·9%)               | 3 (2·2%)                          |

**Table S3.** Primary safety outcome and safety of flow diversion.<sup>1</sup>

|                | Randomization   |                              | Registry<br>N = 45 | Any Flow Diverter*<br>N = 209 |
|----------------|-----------------|------------------------------|--------------------|-------------------------------|
|                | ASMO<br>N = 139 | Flow<br>Divercion<br>N = 139 |                    |                               |
| Death          | 3 (2.2%)        | 2 (1.4%)                     | 2 (4.4%)           | 5 (2.4%)                      |
| mRS 3-5        | 9 (6.5%)        | 14 (10.1%)                   | 5 (11.1%)          | 20 (9.6%)                     |
| Not available  | 2 (1.4%)        | 1 (0.7%)                     | 0                  | 1 (0.5%)                      |
| <b>Total</b>   | 14 (10.1%)      | 17 (12.2%)                   | 7 (15.6%)          | 26 (12.4%)                    |
| Thromboembolic | 7 (5.0%)        | 7 (5.0%)                     | 3 (6.7%)           | 11 (5.3%)                     |
| Hemorrhagic    | 3 (2.2%)        | 4 (2.9%)                     | 1 (2.2%)           | 6 (2.9%)                      |
| Mass Effect    | 2 (1.4%)        | 5 (3.6%)                     | 1 (2.2%)           | 6 (2.9%)                      |
| Unrelated      | 0               | 0                            | 2 (4.4%)           | 2 (1.0%)                      |
| Not available  | 2 (1.4%)        | 1 (0.7%)                     | 0                  | 1 (0.5%)                      |
| <b>Total</b>   | 14 (10.1%)      | 17 (12.2%)                   | 7 (15.6%)          | 26 (12.4%)                    |

1: The primary safety outcome was determined at 3 months. After 3 months, serious delayed FD-related complications such as intracranial hematomas and hemorrhages (n=5) and symptomatic arterial thrombosis (n=5) occurred 37 to 586 days after treatment in 10 of 209 patients who received FD at any time (4.8%; 95%CI[2.4%–8.9%]).

\* Any flow diverter includes: All patients randomly allocated FD (n=139), patients who received FD in the registry (45), and patients of the ASMO group who received FD at any time (14 cross-overs initially and 11 retreatments after the primary efficacy outcome was reached). Patients allocated to FD, crossed-over to FD, or treated with FD in the registry (n=188) initially received a single FD (n=157) or two or more FDs (n=26). In 5 patients the number and type of device was not recorded. The most common devices used were Pipeline (114 patients), Silk (65) and FRED (4).

**Table S4.** Primary efficacy outcome in the per protocol analyses.

|                                                                                                                                                              | <b>Per Protocol (as treated)*</b>   |                                   |
|--------------------------------------------------------------------------------------------------------------------------------------------------------------|-------------------------------------|-----------------------------------|
|                                                                                                                                                              | <b>ASMO<br/>N = 124</b>             | <b>Flow Diversion<br/>N = 134</b> |
| <b>Poor Outcome**</b>                                                                                                                                        | 57 (46.0%)                          | 31 (23.1%)                        |
| Clinical                                                                                                                                                     | 12 (9.7%)                           | 11 (8.2%)                         |
| mRS > 2                                                                                                                                                      | 12 (9.7%)                           | 9 (6.7%)                          |
| Aneurysm rupture                                                                                                                                             | 0                                   | 2 (1.5%)                          |
| Angiographic                                                                                                                                                 | 44 (35.5%)                          | 20 (14.9%)                        |
| Retreatment                                                                                                                                                  | 7 (5.6%)                            | 5 (3.7%)                          |
| Residual aneurysm                                                                                                                                            | 38 (30.6%)                          | 15 (11.2%)                        |
| <b>Good Outcome</b>                                                                                                                                          | 67 (54.0%)                          | 103 (76.9%)                       |
| Angiographic                                                                                                                                                 | 67 (54.0%)                          | 103 (76.9%)                       |
| Complete occlusion                                                                                                                                           | 51 (41.1%)                          | 94 (70.1%)                        |
| Residual neck                                                                                                                                                | 16 (12.9%)                          | 9 (6.7%)                          |
| <i>* "as treated" groups comprise patients having successfully received ASMO or FD on the first attempt</i><br><i>**RR: 0.50; 95%CI[0.35–0.72]; P=0.0002</i> |                                     |                                   |
|                                                                                                                                                              | <b>Per Protocol (as attempted)*</b> |                                   |
|                                                                                                                                                              | <b>ASMO<br/>N = 132</b>             | <b>Flow Diversion<br/>N = 143</b> |
| <b>Poor Outcome**</b>                                                                                                                                        | 65 (49.2%)                          | 40 (28.0%)                        |
| Clinical                                                                                                                                                     | 12 (9.1%)                           | 13 (9.1%)                         |
| mRS > 2                                                                                                                                                      | 12 (9.1%)                           | 11 (7.7%)                         |
| Aneurysm rupture                                                                                                                                             | 0 (0.0%)                            | 2 (1.4%)                          |
| Angiographic                                                                                                                                                 | 53 (40.2%)                          | 27 (18.9%)                        |
| Retreatment                                                                                                                                                  | 7 (5.3%)                            | 5 (3.5%)                          |
| Immediate failure                                                                                                                                            | 8 (6.1%)                            | 7 (4.9%)                          |
| Residual aneurysm                                                                                                                                            | 38 (28.8%)                          | 15 (10.5%)                        |
| <b>Good Outcome</b>                                                                                                                                          | 67 (50.8%)                          | 103 (72.0%)                       |
| Angiographic                                                                                                                                                 | 67 (50.8%)                          | 103 (72.0%)                       |
| Complete occlusion                                                                                                                                           | 51 (38.6%)                          | 94 (65.7%)                        |
| Residual neck                                                                                                                                                | 16 (12.1%)                          | 9 (6.3%)                          |

*\* "as attempted" groups comprise patients having successfully received ASMO or FD on the first attempt, plus those in which ASMO or FD was attempted but could not be successfully carried out*

*\*\*RR: 0.57; 95%CI[0.42–0.78]; P=0.0004*

**Table S5.** Secondary outcomes.

|                                          | Randomization   |                              | Chi-squared test with exact p-value* |
|------------------------------------------|-----------------|------------------------------|--------------------------------------|
|                                          | ASMO<br>N = 139 | Flow<br>Diversion<br>N = 139 |                                      |
| <b>mRS score at discharge</b>            |                 |                              | 0.848                                |
| mRS = 0 – 2                              | 131 (94.2%)     | 129 (92.8%)                  |                                      |
| mRS = 3 – 5                              | 7 (5.0%)        | 8 (5.8%)                     |                                      |
| mRS = 6                                  | 1 (0.7%)        | 2 (1.4%)                     |                                      |
| <b>Hospital stay (days)</b>              |                 |                              | 0.959                                |
| Mean (SD)                                | 7 (26)          | 5 (12)                       |                                      |
| Median [IQ1–IQ3]                         | 1[1–3]          | 1 [1–3]                      |                                      |
| <b>Discharge disposition</b>             |                 |                              | 0.779                                |
| Death                                    | 1 (0.7%)        | 2 (1.4%)                     |                                      |
| Hospital                                 | 6 (4.3%)        | 3 (2.2%)                     |                                      |
| Rehabilitation Center                    | 7 (5.0%)        | 7 (5.0%)                     |                                      |
| Home                                     | 125 (89.9%)     | 127 (91.4%)                  |                                      |
| <b>mRS score at 12 months</b>            |                 |                              | 0.510                                |
| mRS = 0 – 2                              | 123 (88.5%)     | 127 (91.4%)                  |                                      |
| mRS = 3 – 5                              | 5 (3.6%)        | 6 (4.3%)                     |                                      |
| mRS = 6                                  | 9 (6.5%)        | 5 (3.6%)                     |                                      |
| Not available                            | 2 (1.4%)        | 1 (0.7%)                     |                                      |
| <b>Successful intervention</b>           | 131 (94.2%)     | 130 (93.5%)                  | 1.000                                |
| <b>Complications during intervention</b> | 17 (12.2%)      | 17 (12.2%)                   | 0.814                                |
| Thromboembolic                           | 6 (4.3%)        | 8 (5.8%)                     |                                      |
| Hemorrhagic                              | 3 (2.2%)        | 1 (0.7%)                     |                                      |
| Other                                    | 8 (5.8%)        | 8 (5.8%)                     |                                      |
| <b>Retreatment of index aneurysm</b>     | 10 (7.2%)       | 8 (5.8%)                     | 0.808                                |
| <b>Angiographic outcome at 12 months</b> |                 |                              | 0.071                                |
| Residual aneurysm                        | 49 (35.3%)      | 36 (25.9%)                   |                                      |
| Residual neck                            | 17 (12.2%)      | 12 (8.6%)                    |                                      |
| Complete occlusion                       | 71 (51.1%)      | 91 (65.5%)                   |                                      |
| Not available                            | 2 (1.4%)        | 0                            |                                      |

\* except for Hospital stay (Mann–Whitney U test)

**Table S6.** Occlusion state of the aneurysm.

|                         | Randomization  |                 | Chi-squared test<br>with exact p-<br>value* |
|-------------------------|----------------|-----------------|---------------------------------------------|
|                         | ASMO           | Flow Diversion  |                                             |
| Complete occlusion      | 71/137 (51%)   | 91/139 (65.5%)  | 0.028                                       |
| Near-complete occlusion | 88/137 (64.2%) | 103/139 (74.1%) | 0.090                                       |

**Table S7.** Adverse Events.

|                            | Randomization     |                           |
|----------------------------|-------------------|---------------------------|
|                            | ASMO<br>N = 139   | Flow Diversion<br>N = 139 |
| <b>Serious AEs</b>         | <b>27 (19·4%)</b> | <b>28 (20·1%)</b>         |
| <b>Early (&lt;1 month)</b> | <b>18 (12·9%)</b> | <b>18 (12·9%)</b>         |
| Stroke                     | 11 (7·9%)         | 9 (6·5%)                  |
| Hemorrhage                 | 2 (1·4%)          | 2 (1·4%)                  |
| Aneurysm rupture           | 1 (0·7%)          | 1 (0·7%)                  |
| Mass Effect                | 0                 | 4 (2·9%)                  |
| Femoral complication       | 3 (2·2%)          | 1 (0·7%)                  |
| Systemic                   | 1 (0·7%)          | 0                         |
| <b>Late</b>                | <b>3 (2·2%)</b>   | <b>9 (6·5%)</b>           |
| Stroke                     | 2 (1·4%)          | 3 (2·2%)                  |
| Aneurysm rupture           | 0                 | 2 (1·4%)                  |
| Hydrocephalus              | 0                 | 2 (1·4%)                  |
| Mass Effect                | 1 (0·7%)          | 1 (0·7%)                  |
| TIA (hospitalized)         | 0                 | 1 (0·7%)                  |
| <b>Retreatment-related</b> | <b>3 (2·2%)</b>   | <b>1 (0·7%)</b>           |
| <b>Unrelated</b>           | <b>3 (2·2%)</b>   | <b>0</b>                  |
|                            |                   |                           |
| <b>Other AEs</b>           | <b>9 (6·5%)</b>   | <b>22 (15·8%)</b>         |
| <b>Early (&lt;1 month)</b> | <b>6 (4·3%)</b>   | <b>16 (11·5%)</b>         |
| New imaging finding        | 2 (1·4%)          | 8 (5·8%)                  |
| Cranial nerve palsy        | 2 (1·4%)          | 3 (2·1%)                  |
| TIA                        | 2 (1·4%)          | 5 (3·6%)                  |
| <b>Late</b>                | <b>2 (1·4%)</b>   | <b>5 (3·6%)</b>           |
| New imaging finding        | 2 (1·4%)          | 4 (2·9%)                  |
| TIA                        | 0                 | 1 (0·7%)                  |
| <b>Retreatment-related</b> | <b>1 (0·7%)</b>   | <b>1 (0·7%)</b>           |
| <b>Unrelated</b>           | <b>0</b>          | <b>0</b>                  |
| <b>Total</b>               | <b>36 (25·9%)</b> | <b>50 (36·0%)</b>         |

**Table S8.** Details of poor clinical outcomes at any time point, for all patients.

| Age                         | Sex | Aneurysm                                      | Procedure carried out | mRS Score | Days since procedure | Details                                                                                            |
|-----------------------------|-----|-----------------------------------------------|-----------------------|-----------|----------------------|----------------------------------------------------------------------------------------------------|
| Allocated to FD             |     |                                               |                       |           |                      |                                                                                                    |
| 63                          | F   | 20 mm middle cerebral, symptomatic            | Coils + Stent         | 6         | 511                  | Arterial rupture during FD retreatment                                                             |
| 75                          | M   | 3 mm ophthalmic/para-ophthalmic, ruptured     | FD                    | 6         | 8                    | FD migration and carotid thrombosis                                                                |
| 66                          | M   | 24 mm vertebro-basilar junction, symptomatic  | Coils + PVO           | 6         | 1100                 | Continual degradation from quadriplegia and brainstem oedema, secondary to progressive mass effect |
| 81                          | F   | 19 mm carotid cavernous, symptomatic          | PVO + Coils           | 6         | 424                  | Delayed death from stroke                                                                          |
| 57                          | F   | 52 mm carotid terminus, ruptured              | Coils                 | 6         | 1                    | Massive infarction from coiling before FD in delayed setting                                       |
| 56                          | F   | 27 mm basilar terminus, symptomatic           | FD + Coils            | 5         | 95                   | Progressive mass effect                                                                            |
| 66                          | F   | 27 mm superior cerebellar, symptomatic        | FD + Coils            | 5         | 30                   | Progressive mass effect                                                                            |
| 27                          | M   | 30 mm ophthalmic/para-ophthalmic, symptomatic | FD + Coils            | 5         | 54                   | Hydrocephalus treated urgently                                                                     |
| 52                          | F   | 8 mm ophthalmic/para-ophthalmic               | FD                    | 5         | 14                   | Hemorrhagic infarction                                                                             |
| 65                          | M   | 33 mm carotid cavernous, symptomatic          | FD                    | 5         | 9                    | Aneurysmal rupture                                                                                 |
| 51                          | F   | 19 mm basilar terminus, symptomatic           | FD                    | 4         | 23                   | Progressive mass effect                                                                            |
| 72                          | F   | 16 mm vertebro-basilar junction               | FD                    | 4         | 0                    | Stroke                                                                                             |
| 68                          | F   | 10 mm basilar terminus                        | FD + Coils            | 4         | 97                   | Basilar stroke                                                                                     |
| 62                          | F   | 30 mm superior cerebellar, symptomatic        | FD                    | 4         | 1                    | Stroke                                                                                             |
| 42                          | F   | 9 mm carotid cavernous, symptomatic           | FD                    | 3         | 525                  | Failure to reduce mass effect present at registration                                              |
| 74                          | F   | 13 mm carotid cavernous, symptomatic          | FD                    | 3         | 56                   | Progressive mass effect                                                                            |
| 70                          | F   | 13 mm ophthalmic/para-ophthalmic              | PVO + Coils           | 3         | 0                    | Stroke from distal perforation during catheter navigation                                          |
| 74                          | F   | 13 mm ophthalmic/para-ophthalmic              | FD + Coils            | 3         | 0                    | Stroke                                                                                             |
| Registry for flow diversion |     |                                               |                       |           |                      |                                                                                                    |
| 70                          | F   | 14 mm carotid terminus                        | FD + Coils            | 6         | 388                  | Aneurysmal rupture                                                                                 |
| 50                          | M   | 25 mm vertebro-basilar junction, symptomatic  | FD                    | 6         | 586                  | Basilar artery thrombosis following treatment                                                      |
| 82                          | F   | 19 mm carotid cavernous, symptomatic          | FD + Stent            | 6         | 225                  | Unrelated                                                                                          |
| 73                          | F   | 50 mm carotid cavernous, symptomatic          | FD                    | 6         | 8                    | Aneurysmal rupture                                                                                 |
| 76                          | M   | 24 mm vertebro-basilar junction, symptomatic  | FD + Stent            | 6         | 37                   | Basilar artery thrombosis                                                                          |
| 76                          | F   | 2mm posterior circulation, ruptured           | FD                    | 4         | 22                   | Stroke                                                                                             |
| 69                          | M   | 2 mm posterior circulation, ruptured          | FD                    | 4         | 6                    | Initial rupture                                                                                    |
| 38                          | F   | 23 mm posterior circulation                   | FD                    | 4         | 0                    | Stroke from FD thrombosis                                                                          |
| 68                          | M   | 2 mm anterior inferior cerebellar, ruptured   | FD                    | 3         | 59                   | Encephalopathy due to liver disease                                                                |
| Allocated to ASMO           |     |                                               |                       |           |                      |                                                                                                    |
| 17                          | M   | 30 mm vertebro-basilar junction, symptomatic  | FD + Stent            | 6         | 427                  | Vertebro-basilar stroke from FD thrombosis                                                         |
| 38                          | M   | 8 mm vertebro-basilar junction, ruptured      | PVO                   | 6         | 1                    | Rebleeding, 2 hours post-procedure                                                                 |
| 47                          | F   | 20 mm ophthalmic/para-ophthalmic, symptomatic | Surgery               | 6         | 38                   | Intraoperative rupture of aneurysm                                                                 |
| 65                          | F   | 15 mm ophthalmic/para-ophthalmic, symptomatic | Coils + Stent         | 6         | 242                  | Hemorrhage following retreatment                                                                   |
| 68                          | F   | 35 mm vertebro-basilar junction               | PVO                   | 6         | 134                  | Stroke and progressive mass effect                                                                 |
| 74                          | F   | 22 mm vertebro-basilar junction, symptomatic  | PVO                   | 6         | 368                  | Progressive mass effect                                                                            |
| 68                          | F   | 2mm anterior communicating, ruptured          | Surgery               | 6         | 442                  | Lung cancer                                                                                        |
| 75                          | F   | 11 mm carotid terminus                        | FD                    | 6         | 104                  | Stroke with hemorrhagic transformation                                                             |
| 68                          | F   | 16 mm extradural-carotid cavernous            | PVO                   | 6         | 368                  | Cervical cancer                                                                                    |
| 58                          | M   | 50 mm basilar terminus, symptomatic           | PVO                   | 5         | 20                   | Progressive mass effect                                                                            |
| 66                          | F   | 20 mm carotid cavernous, symptomatic          | FD                    | 5         | 23                   | Intraparenchymal hemorrhage                                                                        |
| 38                          | M   | 42 mm basilar terminus, symptomatic           | PVO                   | 5         | 298                  | Failure of interventions to alleviate pre-intervention symptoms                                    |
| 52                          | M   | 12 mm posterior cerebral, symptomatic         | Coils + Stent         | 5         | 270                  | Stroke from stent thrombosis following retreatment                                                 |
| 56                          | M   | 25 mm middle cerebral bifurcation, ruptured   | PVO                   | 4         | 0                    | Stroke                                                                                             |
| 60                          | M   | 13 mm anterior choroidal, symptomatic         | Coils + Stent         | 4         | 33                   | Stroke after patient failed to take anti-platelets after discharge                                 |
| 59                          | M   | 28 mm basilar terminus, symptomatic           | Coils + Stent         | 4         | 665                  | Stroke and hydrocephalus                                                                           |
| 68                          | F   | 16-mm carotid cavernous, symptomatic          | PVO                   | 3         | 1                    | Subdural hemorrhage                                                                                |

**Table S9. mRS scores for all RCT patients**

|                                                     | <b>ASMO<br/>N = 139</b> | <b>FD<br/>N = 139</b> |
|-----------------------------------------------------|-------------------------|-----------------------|
| <b>mRS Primary Safety Outcome (within 3 months)</b> |                         |                       |
| 6                                                   | 3 (2.2%)                | 2 (1.4%)              |
| 5                                                   | 2 (1.4%)                | 4 (2.9%)              |
| 4                                                   | 5 (3.6%)                | 7 (5.0%)              |
| 3                                                   | 2 (1.4%)                | 4 (2.9%)              |
| 2                                                   | 10 (7.2%)               | 11 (7.9%)             |
| 1                                                   | 47 (33.8%)              | 34 (24.5%)            |
| 0                                                   | 68 (48.9%)              | 76 (54.7%)            |
| Not available                                       | 2 (1.4%)                | 1 (0.7%)              |
| <b>mRS Primary Efficacy Outcome</b>                 |                         |                       |
| 6                                                   | 9                       | 5 (3.6%)              |
| 5                                                   | 2 (1.4%)                | 1 (0.7%)              |
| 4                                                   | 2 (1.4%)                | 3 (2.2%)              |
| 3                                                   | 1 (0.7%)                | 2 (1.4%)              |
| 2                                                   | 8 (5.8%)                | 10 (7.2%)             |
| 1                                                   | 51 (36.7%)              | 39 (28.1%)            |
| 0                                                   | 64 (46.0%)              | 78 (56.1%)            |
| Not available                                       | 2 (1.4%)                | 1 (0.7%)              |
